# Supplementary material for: A nanostructured anti-biofilm surface widens the efficacy against spindle-shaped and chain-forming rod-like bacteria
Source: Royal Society of Chemistry journal article supplement (doi:10.1039/d0nr03809a), 2020-01-01
Supplement: d0nr03809a1.pdf [file d0nr03809a1.pdf]

## Supplementary Information

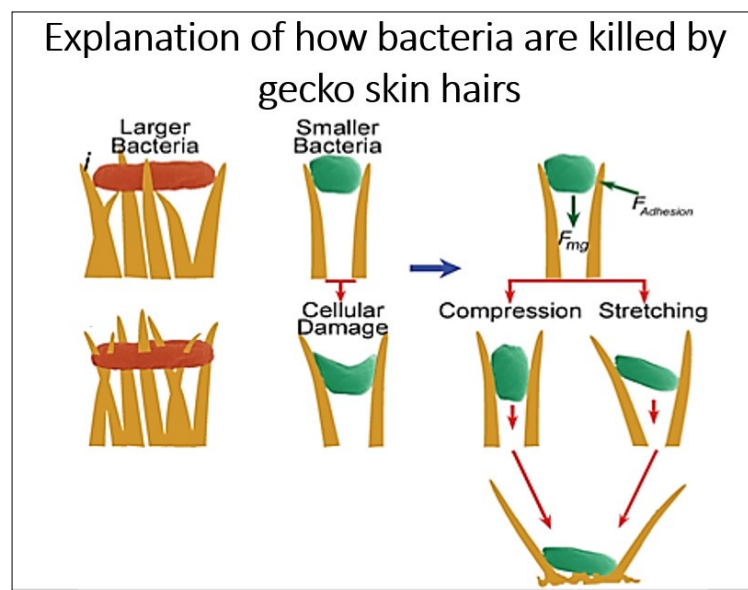

Figure A.

(Source: Nanoscale, 2016, 8, 18860)

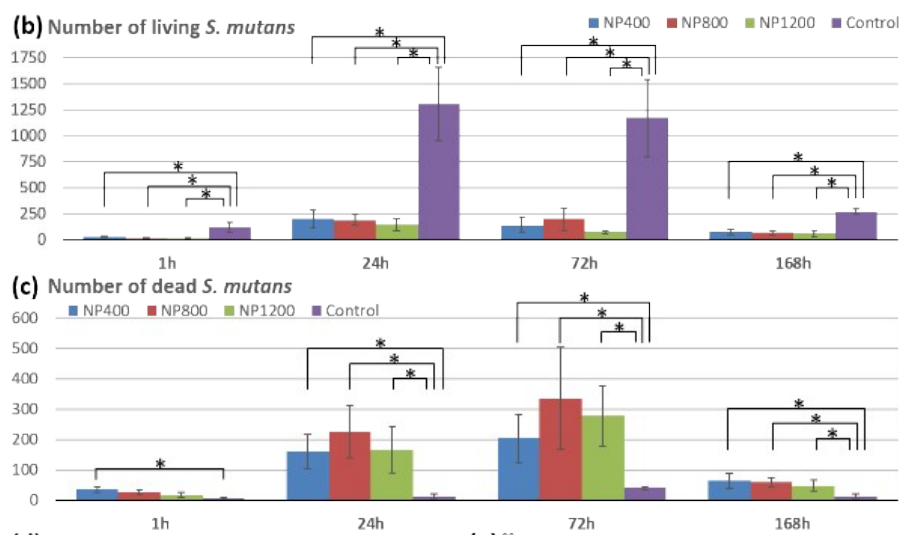

Figure 1. CLSM counts of dead and alive *S. mutans* on the different surface arrays compared to a smooth surface.

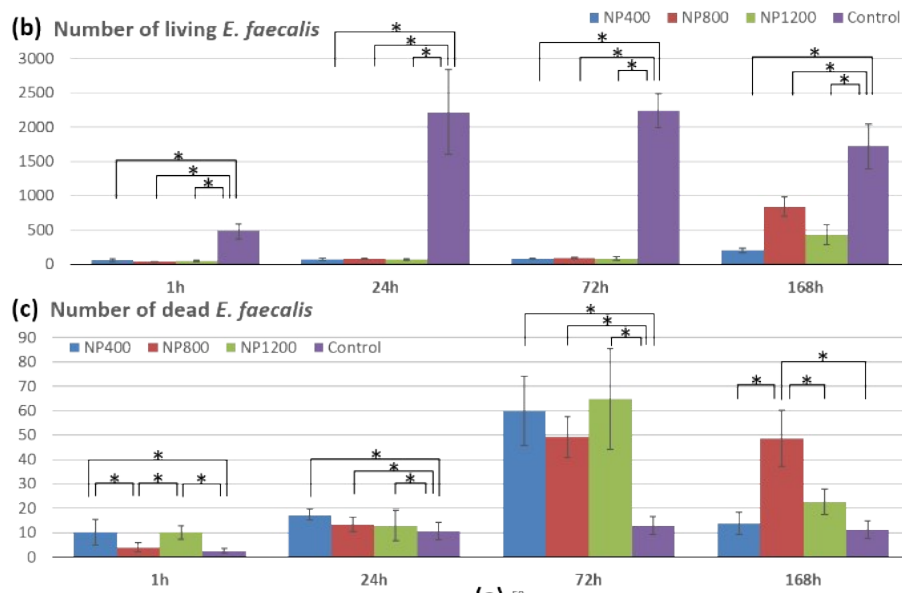

Figure 2. CLSM counts of dead and alive *E. faecalis* on the different surface arrays compared to a smooth surface.

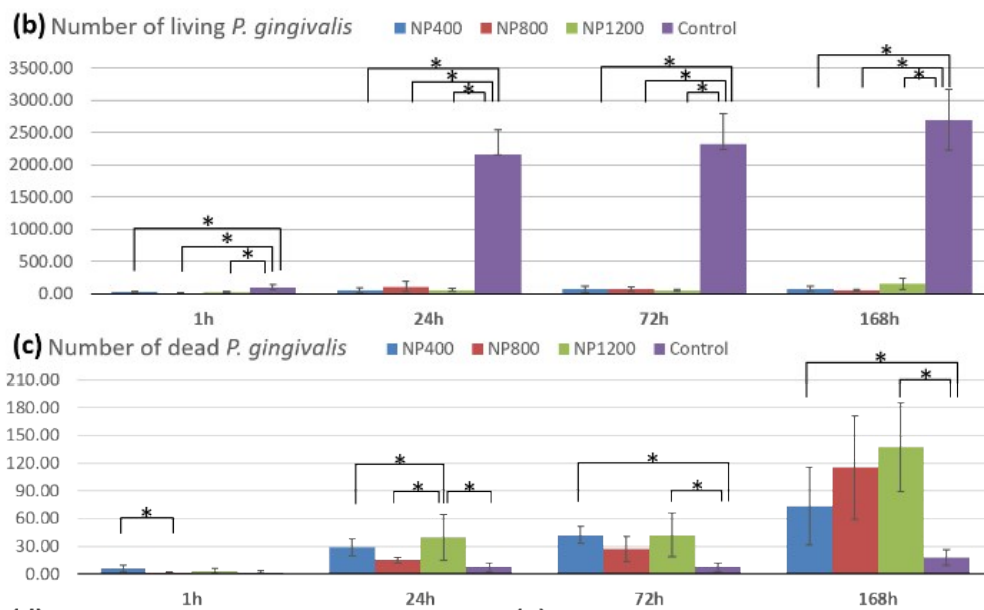

Figure 3. CLSM counts of dead and alive *P. gingivalis* on the different surface arrays compared to a smooth surface.

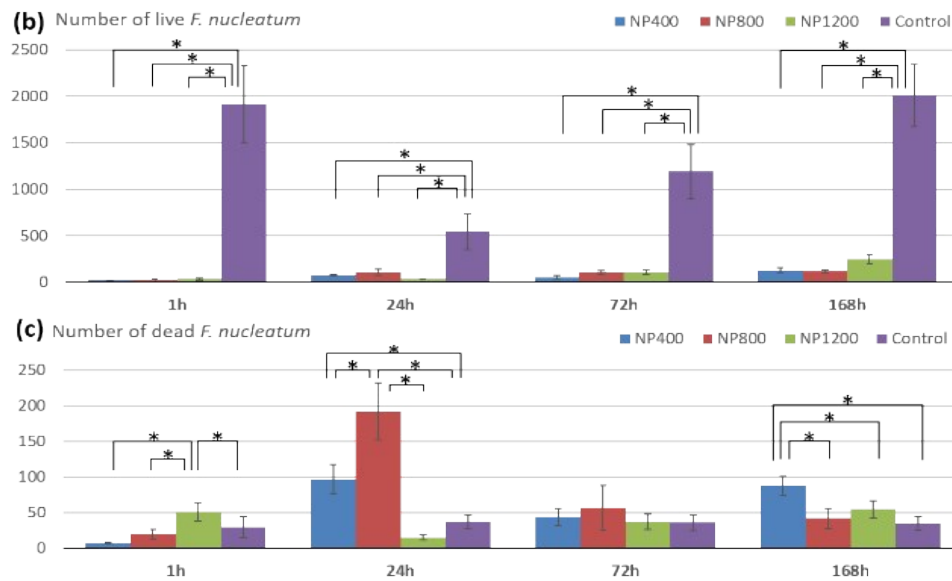

Figure 4. CLSM counts of dead and alive *F. nucleatum* on the different surface arrays compared to a smooth surface.

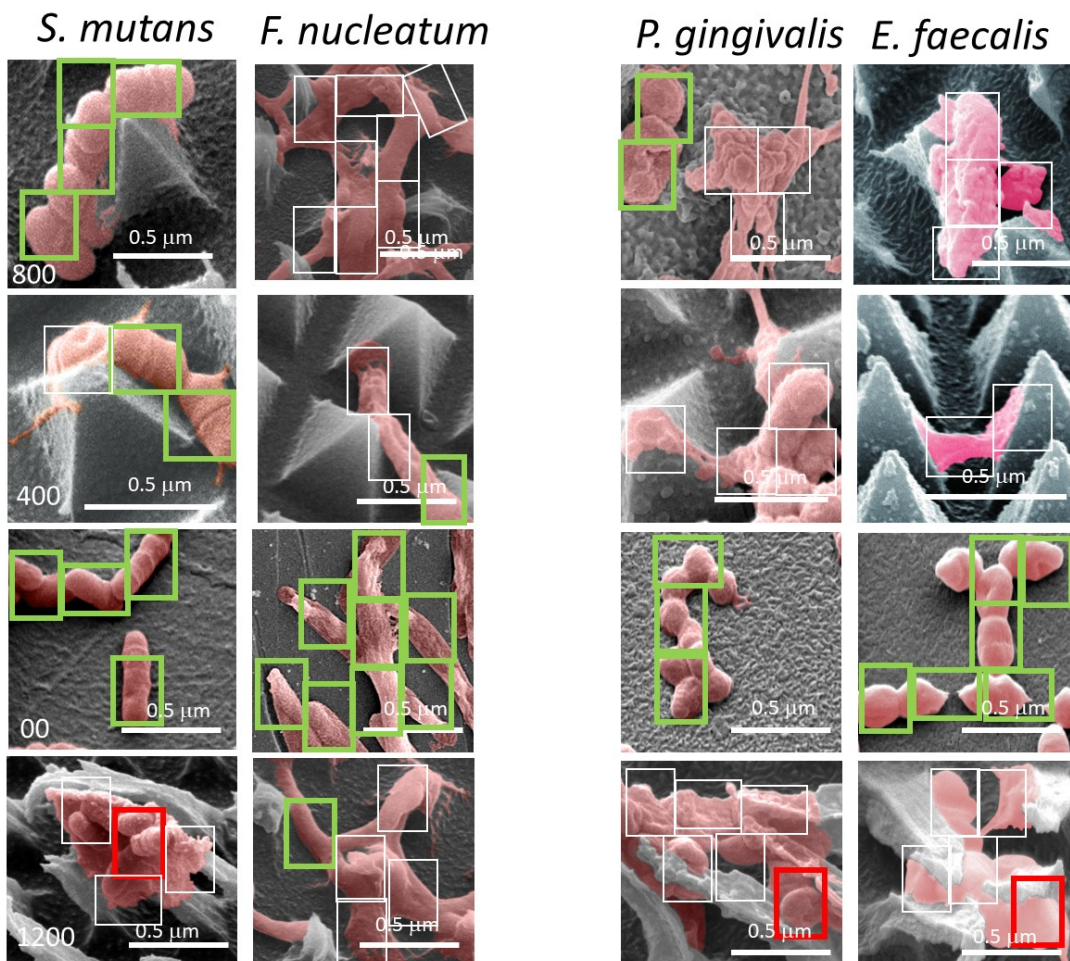

Figure 5. Contact areas for live and dead bacteria on the different pyramid arrays differing by aspect ratio.

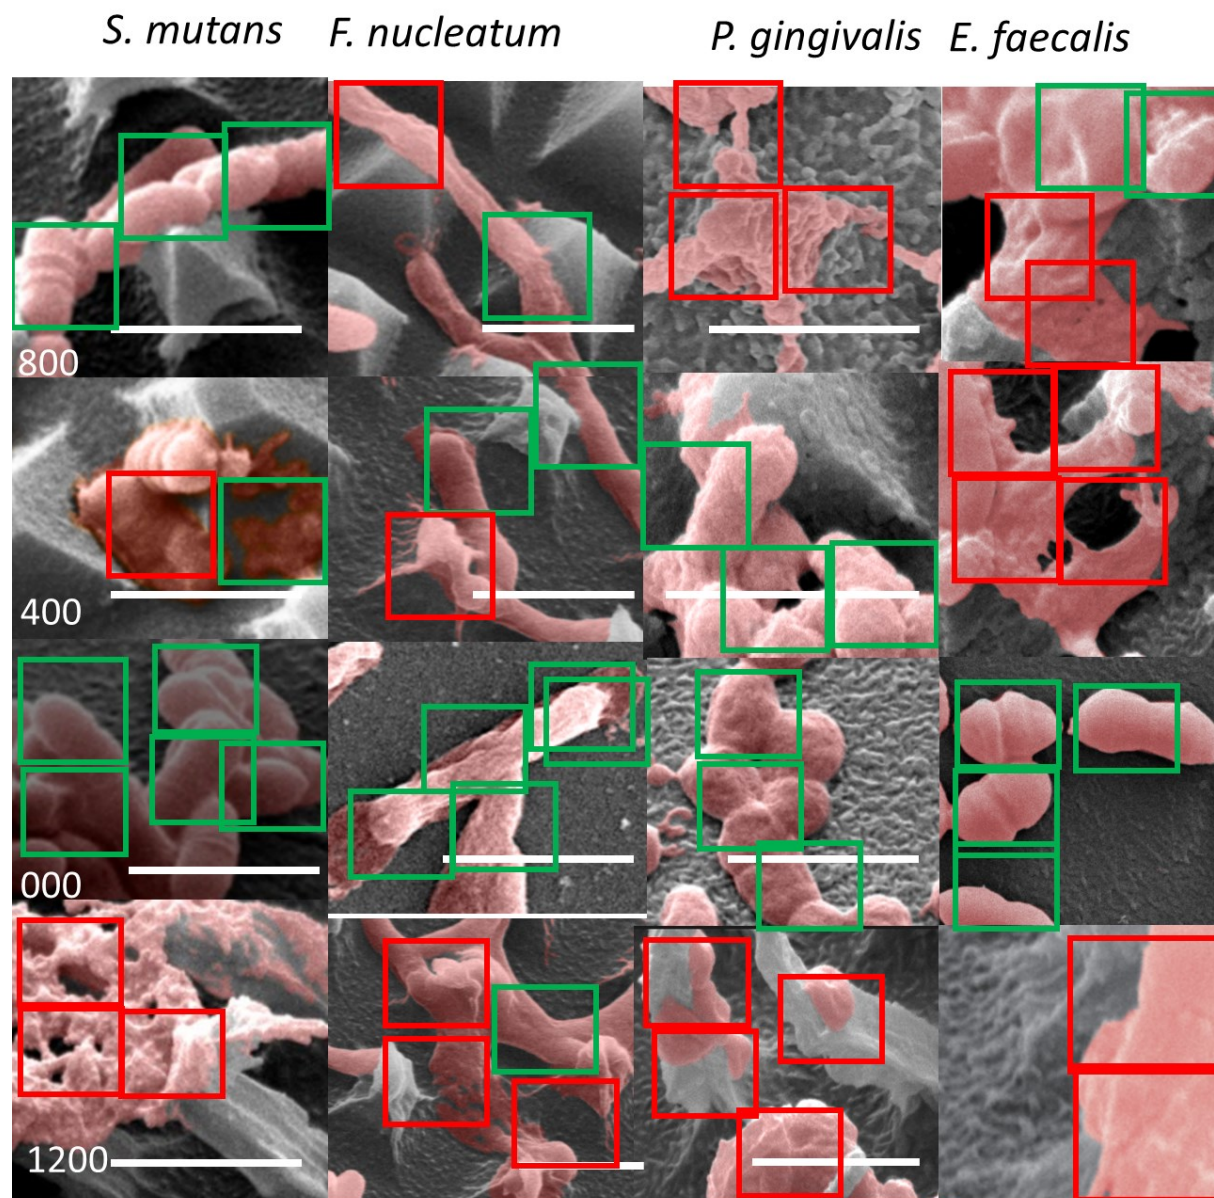

Figure 6. More contact areas for live and dead bacteria on the different pyramid arrays differing by aspect ratio.



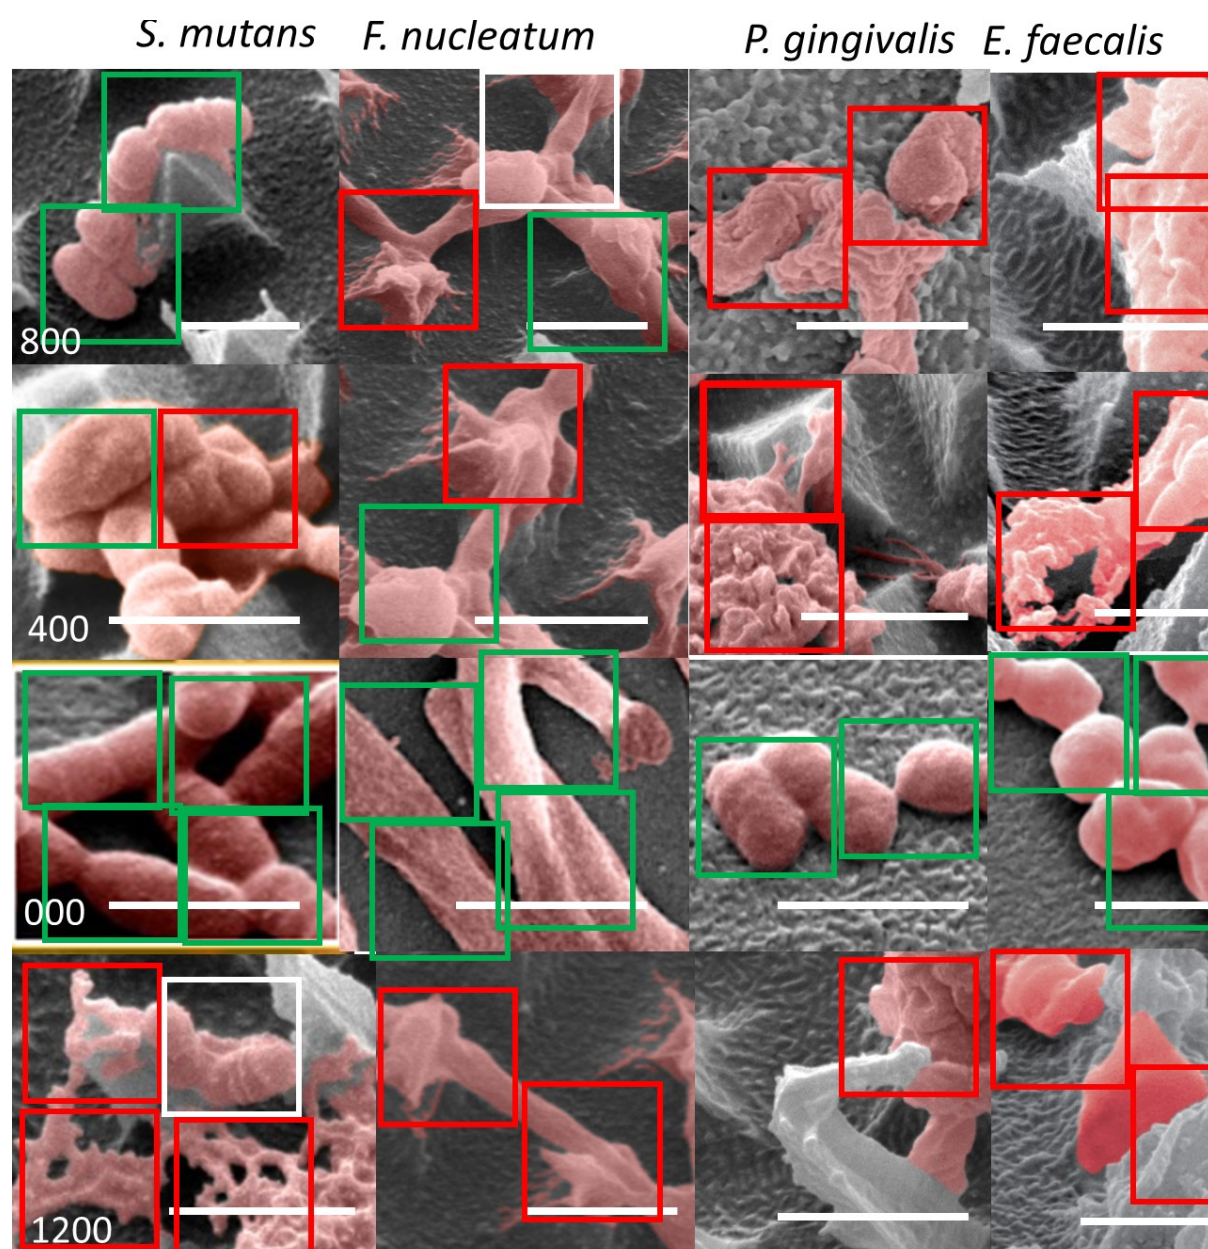

Figure 7. Furthermore contact areas for live and dead bacteria on the different pyramid arrays differing by aspect ratio.
